# Supplementary material
Source: Springer Nature journal article supplement (https://www.springermedizin.de/resource/supplementary/12958_2009_566_MOESM8_ESM.pdf/9568318)

(a)

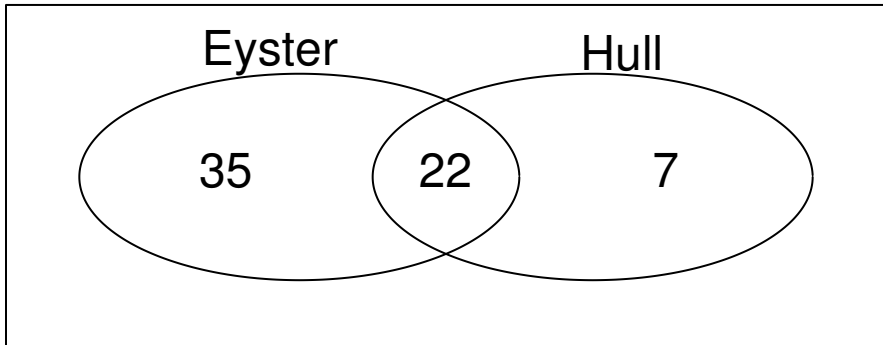

(b)

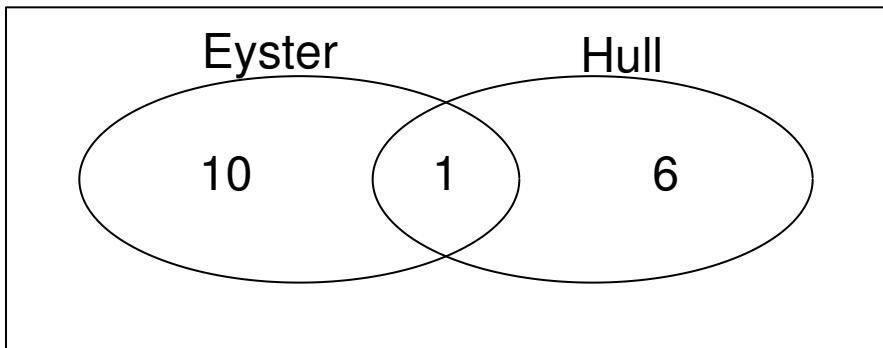

Supplement: MOESM8 [file 9568318]
